# Supplementary material for: Phenylboronic acid modified Ag 2 S NPs for bacterial targeting photothermal antibacterial therapy and promotion of wound healing
Source: Royal Society of Chemistry journal article supplement (doi:10.1039/d5ra09845a), 2026-01-01
Supplement: d5ra09845a1.pdf [file d5ra09845a1.pdf]

## Supporting information

### **Phenylboronic acid modified Ag<sub>2</sub>S NPs for bacterial targeting photothermal antibacterial therapy and promotion of wound healing**

Yixiang HePeng <sup>a,1</sup>, Zhi Xu <sup>bc,1</sup>, Ping Gou <sup>d,1</sup>, Bosong Zhou <sup>a</sup>, Quan Zheng <sup>a</sup>, Ke Zhu <sup>bc</sup>, Xiangfeng Liu<sup>bc</sup>, Ruiyuan Liu <sup>e,\*</sup>, Xu Wu <sup>ab,\*</sup>, Chao Zhang <sup>fg,\*</sup>

<sup>a</sup> Department of Thoracic Surgery, Nanfang Hospital, Southern Medical University, Guangzhou, 510515, China

<sup>b</sup> Huiqiao Medical Center, Nanfang Hospital, Southern Medical University, Guangzhou, 510515, China

<sup>c</sup> Department of General Practice, Nanfang Hospital, Southern Medical University, Guangzhou, 510515, China

<sup>d</sup> Department of Medicine Ultrasonics, Nanfang Hospital, Southern Medical University, Guangzhou, 510515, China

<sup>e</sup> Biomaterials Research Center, School of Biomedical Engineering, Southern Medical University, Guangzhou, 510515, China

<sup>f</sup> Experimental Education/Administration Center, National Demonstration Center for Experimental Basic Medical Education, School of Basic Medical Science, Southern Medical University, Guangzhou, 510515, China

<sup>g</sup> Department of Biochemistry and Molecular Biology, School of Basic Medical Science, Southern Medical University, Guangzhou, 510515, China

\*Corresponding authors.

E-mail addresses: super1998@smu.edu.cn (C. Zhang), wuxu\_southhospital@163.com (X. Wu), ruiyliu@smu.edu.cn (R. Liu)

<sup>1</sup>These three authors contributed equally to this work.

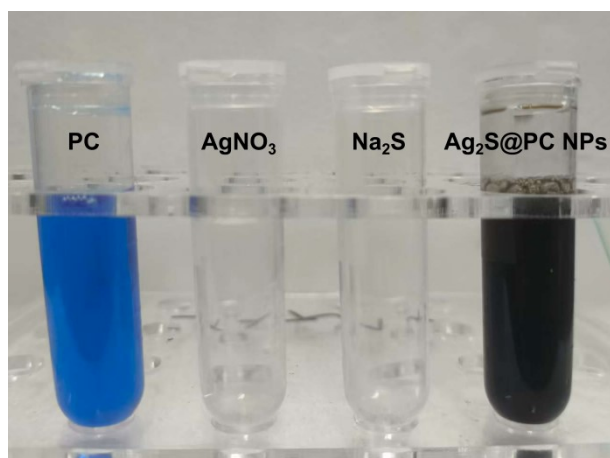

**Figure S1.** Photographs of phycocyanin, AgNO<sub>3</sub>, Na<sub>2</sub>S and Ag<sub>2</sub>S@PC NPs solution.

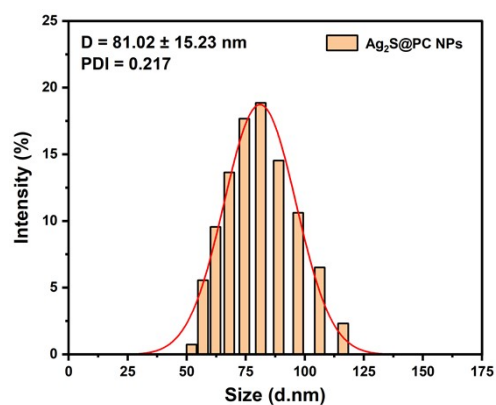

**Figure S2.** DLS results of Ag<sub>2</sub>S@PC NPs.

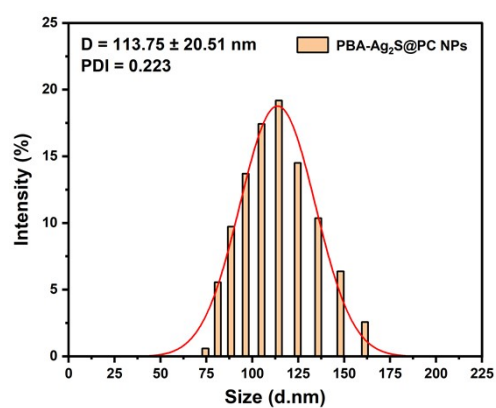

**Figure S3.** DLS results of PBA-Ag<sub>2</sub>S@PC NPs.

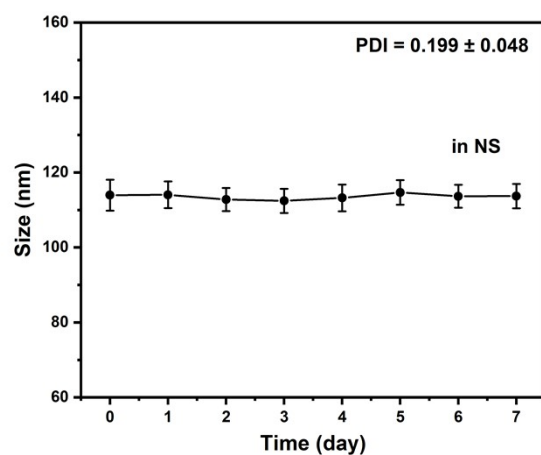

**Figure S4.** The size of PBA-Ag<sub>2</sub>S@PC NPs after being stored for 7 days in NS (n=3).

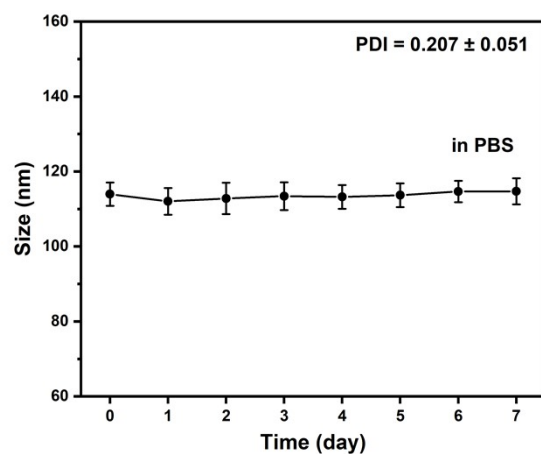

**Figure S5.** The size of PBA-Ag<sub>2</sub>S@PC NPs after being stored for 7 days in PBS (n=3).

| Samples                  | Ag (%) | S (%) | C (%) | N (%) | O (%) | B (%) |
|--------------------------|--------|-------|-------|-------|-------|-------|
| Ag <sub>2</sub> S@PC     | 1.06   | 0.94  | 61.94 | 9.63  | 26.43 | 0     |
| PBA-Ag <sub>2</sub> S@PC | 1.01   | 0.91  | 61.46 | 9.36  | 25.19 | 2.07  |

**Table 1.** Elemental compositions in samples assessed by XPS.

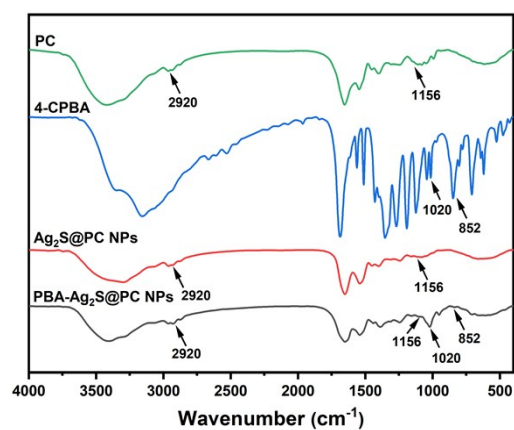

**Figure S6.** The FT-IR spectra of PC, 4-CPBA, Ag<sub>2</sub>S@PC NPs and PBA-Ag<sub>2</sub>S@PC NPs.

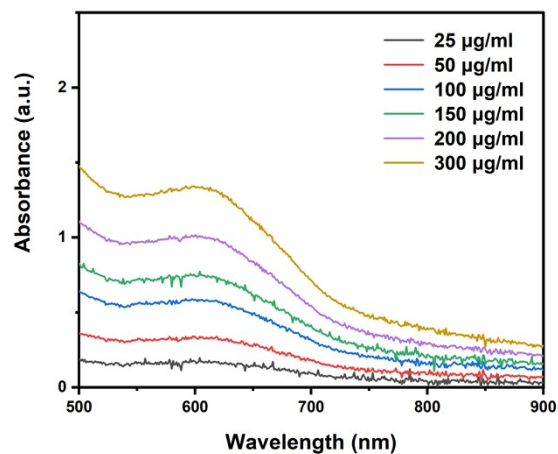

**Figure S7.** UV-vis spectra of PBA-Ag<sub>2</sub>S@PC NPs with different concentrations.

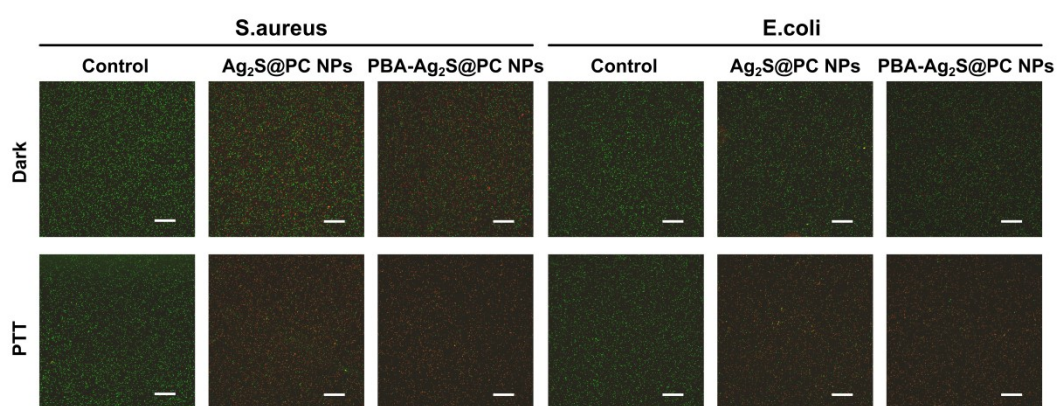

**Figure S8.** Live/Dead fluorescence co-staining images of *S. aureus* and *E. coli* after various treatments, Scale =100 µm.

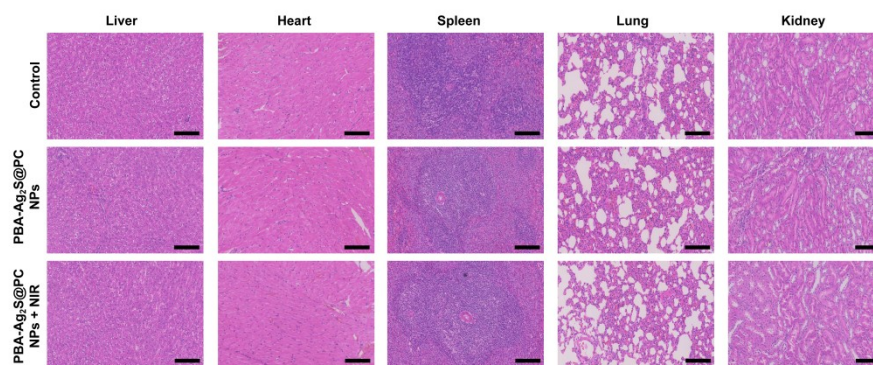

**Figure S9.** Major organs (liver, heart, spleen, lung, and kidney) after various treatments. Scale = 100  $\mu$ m.

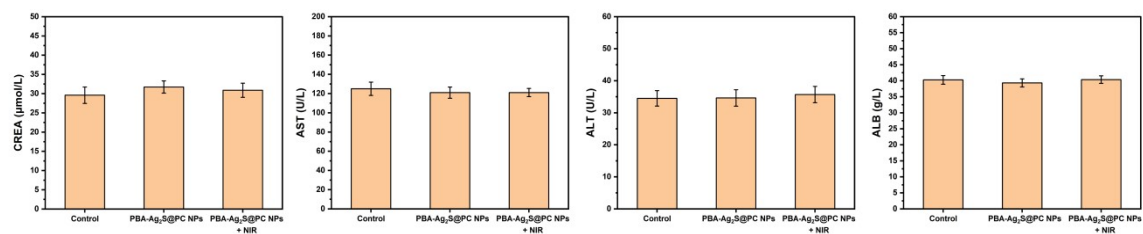

**Figure S10.** Blood panel analysis of rats after various treatments (n=3).
